# Supplementary material
Source: Research Square preprint supplement (doi:10.21203/rs.3.rs-10112780/v1)
Supplement: Supplementary file 1 [file 540ac68261d56544a075f666.xlsx]

## Sheet: Sheet1
Experimental Name	total_params	trainable_params	flops_gflops	model_size_mb	memory_usage_mb	avg_inference_time_ms	fps	noise_robustness	augmentation_robustness	lighting_robustness	iou_75_performance	iou_85_performance	iou_90_performance	tensorrt_compatibility	onnx_compatibility	quantization_compatibility	pruning_compatibility	epoch_Max	epoch_Min	epoch_Mean	time_Max	time_Min	time_Mean	train/box_loss_Max	train/box_loss_Min	train/box_loss_Mean	train/cls_loss_Max	train/cls_loss_Min	train/cls_loss_Mean	train/dfl_loss_Max	train/dfl_loss_Min	train/dfl_loss_Mean	train/angle_loss_Max	train/angle_loss_Min	train/angle_loss_Mean	metrics/precision(B)_Max	metrics/precision(B)_Min	metrics/precision(B)_Mean	metrics/recall(B)_Max	metrics/recall(B)_Min	metrics/recall(B)_Mean	metrics/mAP50(B)_Max	metrics/mAP50(B)_Min	metrics/mAP50(B)_Mean	metrics/mAP50-95(B)_Max	metrics/mAP50-95(B)_Min	metrics/mAP50-95(B)_Mean
Head 11 C3k2_GhostConv Replace	2946081	0	3.44588	6.02223	11.2384	67.7347	14.7635	0.827203	0.971714	0.925425	0.977797	0.974154	0.971724	0.9	0.95	0.85	0.9	174	1	87.5	3797.47	23.1103	1918.26	1.19024	0.19766	0.295101	2.45824	0.21872	0.38261	2.26678	0.90951	1.03288	0.32408	0.01544	0.0362461	0.99783	0.34342	0.959606	0.98974	0.77438	0.96054	0.99484	0.42832	0.977877	0.97331	0.3346	0.939524
Head 2 C3k2_GhostConv Replace	2652705	0	3.31683	5.46434	10.1193	68.5918	14.579	0.853325	0.850443	0.831585	0.687568	0.626044	0.585028	0.9	0.95	0.85	0.9	144	1	72.5	3236.17	23.5606	1633.02	1.15736	0.24741	0.407648	2.31249	0.2743	0.626476	2.28717	0.96412	1.17731	0.31364	0.026	0.0687629	0.95109	0.22443	0.737956	0.99359	0.77331	0.886302	0.97623	0.33766	0.831032	0.57923	0.25864	0.51057
Head 5 C3k2_GhostConv Replace	2662625	0	3.33382	5.48515	10.1571	69.2324	14.4441	0.839994	0.969883	0.863801	0.828876	0.793863	0.770521	0.9	0.95	0.85	0.9	158	1	79.5	3460.68	23.2356	1743.76	1.20904	0.22449	0.369036	2.30934	0.26712	0.529599	2.19777	0.93726	1.12552	0.32878	0.02143	0.0565796	0.99425	0.24919	0.880155	0.97085	0.7467	0.925541	0.99275	0.33137	0.926027	0.76906	0.22932	0.708788
Head 6 GhostConv Replace	2650728	0	3.32553	5.44995	10.1117	67.3698	14.8435	0.842338	0.953241	0.823023	0.706729	0.649154	0.610772	0.9	0.95	0.85	0.9	93	1	47	2043.66	23.9724	1035.06	1.19801	0.28395	0.461876	2.36213	0.34955	0.821489	2.427	1.0302	1.23132	0.3173	0.02433	0.0814019	0.95563	0.21545	0.693375	0.98621	0.78066	0.882726	0.98069	0.30722	0.78579	0.63801	0.22671	0.521202
Head 6 GhostConv Replace + Head 11 C3k2_GhostConv Replace	2934522	0	3.42571	6.01492	11.1943	70.2824	14.2283	0.809747	0.944349	0.891066	0.960827	0.953704	0.948955	0.9	0.95	0.85	0.9	200	1	100.5	4417.21	24.0287	2221.66	1.22432	0.23955	0.348517	2.64932	0.29086	0.449673	2.39515	0.9469	1.10275	0.32511	0.0224	0.0454941	0.99439	0.2603	0.959164	0.99295	0.79376	0.971342	0.99435	0.49118	0.98202	0.95053	0.35147	0.914089
Head 6 GhostConv Replace + Head 2 C3k2_GhostConv Replace	2641146	0	3.29666	5.44452	10.0752	71.0135	14.0818	0.918696	0.910752	0.915239	0.719985	0.663667	0.626123	0.9	0.95	0.85	0.9	78	1	39.5	1753.67	24.4737	890.166	1.20509	0.2749	0.467499	2.38733	0.32136	0.686862	2.28921	1.01076	1.27072	0.32181	0.02814	0.0791131	0.99648	0.18963	0.867404	0.99326	0.76604	0.951579	0.99394	0.30262	0.922334	0.7063	0.20934	0.627614
Head 6 GhostConv Replace + Head 5 C3k2_GhostConv Replace	2651066	0	3.31365	5.47174	10.113	70.8118	14.1219	0.829565	0.868741	0.832329	0.821963	0.788991	0.767011	0.9	0.95	0.85	0.9	138	1	69.5	3101.27	24.1513	1564.61	1.16754	0.22772	0.405087	2.09711	0.28082	0.571615	2.22931	0.94058	1.14889	0.31569	0.02109	0.0910162	0.95773	0.39336	0.81091	0.94476	0.67742	0.879392	0.981	0.51049	0.882708	0.76755	0.35703	0.682553
Head 6 GhostConv Replace + Head 8 C3k2_GhostConv Replace	2628858	0	3.277	5.42218	10.0283	69.8793	14.3104	0.93289	0.87072	0.895768	0.698636	0.635933	0.594131	0.9	0.95	0.85	0.9	86	1	43.5	1934.74	24.3993	980.099	1.20598	0.29084	0.496217	2.47743	0.32824	0.739884	2.43855	1.02872	1.32391	0.32467	0.02618	0.0848273	0.98063	0.2079	0.81402	0.98786	0.75577	0.916771	0.99321	0.32178	0.88717	0.7272	0.21223	0.602491
Head 6 GhostConv Replace + Backbone 2 C3k2_GhostConv Replace	2655018	0	3.38205	5.47265	10.1281	78.6015	12.7224	0.836373	0.903786	0.82584	0.81362	0.77507	0.74937	0.9	0.95	0.85	0.9	89	1	45	1995.46	24.3849	1011.11	1.18838	0.21981	0.352979	2.41699	0.25763	0.602759	2.27508	0.95336	1.12592	0.31765	0.01677	0.0443787	0.99436	0.23563	0.858544	0.99359	0.83015	0.950302	0.99437	0.31439	0.904939	0.76729	0.20586	0.688535
Head 6 GhostConv Replace + Backbone 4 C3k2_GhostConv Replace	2664922	0	3.36363	5.49475	10.1659	72.8743	13.7223	0.869603	0.926783	0.863054	0.76613	0.72026	0.68968	0.9	0.95	0.85	0.9	109	1	55	2458.74	24.0178	1243.01	1.18877	0.26605	0.434094	2.28961	0.32576	0.662745	2.22233	0.98036	1.19483	0.31215	0.02912	0.0660266	0.98696	0.15846	0.805812	0.99679	0.75781	0.902869	0.98113	0.26213	0.886067	0.70896	0.17348	0.623411
Head 6 GhostConv Replace + Backbone 6 C3k2_GhostConv Replace	2702522	0	3.39476	5.55905	10.3093	69.6419	14.3592	0.841246	0.92341	0.891329	0.506575	0.428928	0.377163	0.9	0.95	0.85	0.9	113	1	57	2509.08	24.2764	1269.5	1.18826	0.26249	0.414093	2.42318	0.29845	0.836738	2.22458	0.99316	1.20854	0.30911	0.02861	0.064735	0.73444	0.23594	0.534902	0.98968	0.62474	0.858452	0.91185	0.3136	0.716756	0.46898	0.21043	0.375455
Head 6 GhostConv Replace + Backbone 8 C3k2_GhostConv Replace	2852602	0	3.39294	5.84732	10.8818	69.8217	14.3222	0.942744	0.941255	0.863591	0.866764	0.839407	0.821169	0.9	0.95	0.85	0.9	121	1	61	2694.94	24.2628	1362.06	1.0107	0.2548	0.416874	1.99492	0.24991	0.50459	2.04791	0.95866	1.17621	0.31116	0.02957	0.0846193	0.99286	0.25616	0.904092	0.99025	0.65149	0.900055	0.99465	0.38215	0.932389	0.83247	0.31299	0.765946
Head 8 C3k2_GhostConv Replace	2640417	0	3.29717	5.44047	10.0724	68.3024	14.6408	0.813025	0.96403	0.853598	0.843961	0.811881	0.790493	0.9	0.95	0.85	0.9	141	1	71	3144.99	23.4371	1581.3	1.13715	0.21545	0.350548	2.21578	0.2543	0.51516	2.1262	0.92985	1.11515	0.32059	0.01848	0.054099	0.9926	0.26131	0.901165	0.98033	0.76832	0.926454	0.99389	0.35519	0.949257	0.79672	0.24759	0.752491
Head 9 GhostConv Replace	2614584	0	3.32497	5.37354	9.97385	66.242	15.0962	0.85662	0.860761	0.882375	0.868984	0.842002	0.824014	0.9	0.95	0.85	0.9	57	1	29	1222.58	23.0522	623.202	1.19364	0.23415	0.379633	2.22522	0.25356	0.443021	2.27259	0.95791	1.1318	0.32125	0.02129	0.0718967	0.99845	0.42746	0.97361	0.9922	0.73823	0.965734	0.99494	0.56649	0.983495	0.83622	0.43797	0.801866
Head 9 GhostConv Replace + Head 11 C3k2_GhostConv Replace	2898378	0	3.42515	5.94601	11.0564	69.3031	14.4294	0.944893	0.870482	0.856765	0.856963	0.831912	0.81521	0.9	0.95	0.85	0.9	163	1	82	3606.6	24.1313	1811.24	1.2088	0.27239	0.413403	2.26825	0.32685	0.524919	2.26063	0.99475	1.1898	0.33072	0.02721	0.0604183	0.98173	0.43606	0.880732	0.98163	0.40399	0.863899	0.99206	0.4808	0.918433	0.85303	0.31675	0.74935
Head 9 GhostConv Replace + Head 2 C3k2_GhostConv Replace	2605002	0	3.2961	5.37829	9.93729	74.2352	13.4707	0.94244	0.934555	0.870777	0.79603	0.75415	0.72623	0.9	0.95	0.85	0.9	96	1	48.5	2163.57	24.5471	1095.26	1.14701	0.22079	0.342929	2.17611	0.23926	0.517044	2.22704	0.93692	1.07956	0.33328	0.01837	0.0520359	0.99245	0.44241	0.902369	0.98929	0.86576	0.944806	0.99363	0.54827	0.955242	0.73158	0.42853	0.69918
Head 9 GhostConv Replace + Head 5 C3k2_GhostConv Replace	2614922	0	3.31309	5.3963	9.97514	74.7844	13.3718	0.891036	0.966595	0.933715	0.771148	0.725014	0.694258	0.9	0.95	0.85	0.9	90	1	45.5	2074.86	24.4916	1050.4	1.20427	0.34191	0.554955	2.54735	0.42048	0.772168	2.30465	1.08663	1.40574	0.31051	0.03763	0.0926027	0.96479	0.18024	0.79709	0.98321	0.32191	0.909313	0.98774	0.13865	0.909548	0.72131	0.0973	0.669347
Head 9 GhostConv Replace + Head 8 C3k2_GhostConv Replace	2592714	0	3.27644	5.35193	9.89042	69.4261	14.4038	0.804011	0.935064	0.918222	0.773138	0.726359	0.695173	0.9	0.95	0.85	0.9	75	1	38	1694.41	24.5917	862.259	1.17953	0.33265	0.529227	2.27027	0.3597	0.650394	2.24859	1.08592	1.38546	0.30995	0.03462	0.0866167	0.9719	0.28039	0.927447	0.99108	0.7357	0.920104	0.99255	0.43289	0.963745	0.75087	0.29743	0.697187
Head 9 GhostConv Replace + Backbone 2 C3k2_GhostConv Replace	2618874	0	3.38149	5.4032	9.99021	77.4458	12.9123	0.930764	0.898906	0.937389	0.699274	0.636727	0.595029	0.9	0.95	0.85	0.9	84	1	42.5	1933.56	24.9413	979.293	1.21586	0.26751	0.425535	2.65806	0.29848	0.732801	2.49365	1.02018	1.25688	0.3183	0.01974	0.0474848	0.98233	0.03483	0.787865	0.97244	0.07436	0.910073	0.99116	0.02305	0.863704	0.60977	0.01061	0.524055
Head 9 GhostConv Replace + Backbone 4 C3k2_GhostConv Replace	2628778	0	3.36307	5.42633	10.028	72.9428	13.7094	0.858017	0.908913	0.822035	0.864816	0.839808	0.823136	0.9	0.95	0.85	0.9	111	1	56	2492.2	24.4401	1260.06	1.10931	0.22592	0.365844	2.14127	0.27287	0.51217	2.10977	0.93144	1.09783	0.3092	0.01898	0.0650415	0.9815	0.44744	0.927412	0.9711	0.78168	0.92377	0.99092	0.48282	0.953133	0.82695	0.33999	0.78787
Head 9 GhostConv Replace + Backbone 6 C3k2_GhostConv Replace	2666378	0	3.3942	5.49545	10.1714	68.962	14.5007	0.843707	0.920905	0.85082	0.814929	0.78116	0.758647	0.9	0.95	0.85	0.9	150	1	75.5	3317.92	23.9718	1672	1.21533	0.26236	0.409261	2.41159	0.31127	0.596587	2.35572	0.98156	1.18311	0.31675	0.02831	0.0716531	0.9842	0.23205	0.820973	0.96863	0.6743	0.897917	0.98243	0.35095	0.894724	0.76075	0.23981	0.690838
Head 9 GhostConv Replace + Backbone 8 C3k2_GhostConv Replace	2816458	0	3.39239	5.78275	10.7439	68.149	14.6737	0.809058	0.972419	0.913718	0.727981	0.677165	0.643289	0.9	0.95	0.85	0.9	151	1	76	3403.57	23.9656	1714.6	1.27362	0.25363	0.47826	2.62757	0.26786	0.552537	2.43127	0.98576	1.30994	0.33149	0.02413	0.0790299	0.95992	0.31975	0.87081	0.84917	0.55813	0.746081	0.97568	0.34905	0.871033	0.65295	0.22895	0.588918
Backbone 0 GhostConv Replace	2662640	0	3.35307	5.47107	10.1572	71.4571	13.9944	0.802135	0.891427	0.891449	0.811501	0.772266	0.746108	0.9	0.95	0.85	0.9	94	1	47.5	2043.59	23.6312	1040.28	1.27109	0.24373	0.427604	2.41686	0.26503	0.507427	2.3541	0.96534	1.22966	0.3157	0.02282	0.0694337	0.99762	0.29816	0.939762	0.99415	0.80493	0.958038	0.99486	0.46055	0.963111	0.75272	0.29088	0.688504
Backbone 0 GhostConv Replace + Head 11 C3k2_GhostConv Replace	2946434	0	3.45326	6.03854	11.2398	75.069	13.3211	0.845996	0.949845	0.918746	0.976653	0.972916	0.970426	0.9	0.95	0.85	0.9	200	1	100.5	4496.83	23.9249	2259.51	1.15855	0.19801	0.289324	2.41974	0.20982	0.417501	2.18768	0.90494	1.01147	0.31694	0.01657	0.0377738	0.98934	0.25062	0.910805	0.99419	0.79883	0.956236	0.99428	0.33601	0.949247	0.97102	0.26522	0.910368
Backbone 0 GhostConv Replace + Head 2 C3k2_GhostConv Replace	2653058	0	3.3242	5.48517	10.1206	75.1908	13.2995	0.921179	0.905046	0.831558	0.839307	0.806504	0.784635	0.9	0.95	0.85	0.9	200	1	100.5	4616.2	24.8384	2325.27	1.17058	0.21777	0.310584	2.37048	0.23622	0.43916	2.18962	0.92767	1.05399	0.31367	0.01851	0.0374669	0.99289	0.23357	0.926134	0.96555	0.44719	0.919147	0.99249	0.23304	0.950918	0.77866	0.18488	0.736631
Backbone 0 GhostConv Replace + Head 5 C3k2_GhostConv Replace	2662978	0	3.34119	5.48553	10.1585	75.9984	13.1582	0.816757	0.979296	0.82993	0.783343	0.738251	0.70819	0.9	0.95	0.85	0.9	67	1	34	1539.33	24.3306	782.657	1.13662	0.34767	0.518851	2.0702	0.34305	0.604808	2.17926	1.11323	1.3727	0.30859	0.04385	0.0779021	0.99928	0.47151	0.939912	0.98228	0.82183	0.948589	0.99377	0.52803	0.96881	0.74117	0.40361	0.702241
Backbone 0 GhostConv Replace + Head 8 C3k2_GhostConv Replace	2640770	0	3.30454	5.44348	10.0737	74.6278	13.3998	0.897064	0.904614	0.870897	0.039727	0.0372685	0.0356295	0.9	0.95	0.85	0.9	57	1	29	1325.39	24.2529	674.71	1.12875	0.32415	0.481888	2.17302	0.41232	0.655116	2.24531	1.08875	1.32417	0.3066	0.03313	0.0815258	0.66265	0.01707	0.133465	0.8111	0.21876	0.636418	0.77269	0.01452	0.142003	0.53939	0.01019	0.10028
Backbone 0 GhostConv Replace + Backbone 2 C3k2_GhostConv Replace	2666930	0	3.4096	5.49499	10.1735	82.5615	12.1122	0.831039	0.892266	0.91587	0.744029	0.70948	0.686446	0.9	0.95	0.85	0.9	79	1	40	1783.51	24.3735	904.548	1.23211	0.34189	0.521126	2.32903	0.37857	0.632811	2.32134	1.07325	1.33253	0.3216	0.04213	0.0946523	0.97705	0.41261	0.893246	0.87758	0.6562	0.806427	0.9451	0.51021	0.895165	0.73727	0.35387	0.68777
Backbone 0 GhostConv Replace + Backbone 4 C3k2_GhostConv Replace	2676834	0	3.39117	5.52002	10.2113	77.2101	12.9517	0.938629	0.921282	0.834424	0.877515	0.852622	0.836028	0.9	0.95	0.85	0.9	120	1	60.5	2702.19	23.9027	1364.72	1.10028	0.21423	0.361331	2.16953	0.24747	0.480149	2.14152	0.91411	1.08704	0.32871	0.02667	0.0789645	0.99556	0.18868	0.926885	0.99135	0.74862	0.951796	0.99371	0.29324	0.957685	0.84215	0.22701	0.802179
Backbone 0 GhostConv Replace + Backbone 6 C3k2_GhostConv Replace	2714434	0	3.4223	5.57877	10.3547	74.1908	13.4788	0.842764	0.918883	0.916883	0.847263	0.815716	0.794686	0.9	0.95	0.85	0.9	70	1	35.5	1554.27	24.6006	792.131	1.24664	0.29065	0.542095	2.43588	0.32495	0.645061	2.4377	1.04116	1.40334	0.32959	0.03023	0.0938223	0.99796	0.32625	0.955551	0.99279	0.50353	0.957471	0.99488	0.36004	0.973068	0.79675	0.24128	0.767239
Backbone 0 GhostConv Replace + Backbone 8 C3k2_GhostConv Replace	2864514	0	3.42049	5.86807	10.9273	75.3601	13.2696	0.816232	0.945443	0.846871	0.863708	0.837374	0.819818	0.9	0.95	0.85	0.9	101	1	51	2282.56	23.6779	1152.85	1.25368	0.2788	0.486654	2.44149	0.30891	0.623272	2.34059	0.98511	1.28048	0.32787	0.03121	0.0719299	0.98002	0.31595	0.89734	0.97634	0.81325	0.926371	0.98984	0.33767	0.9459	0.82144	0.11895	0.775951
Backbone 1 GhostConv Replace	2661640	0	3.31539	5.47174	10.1534	69.0516	14.4819	0.947378	0.868105	0.912844	0.806291	0.766455	0.739899	0.9	0.95	0.85	0.9	123	1	62	2578.71	22.3605	1301.13	1.19916	0.24681	0.435216	2.41877	0.28789	0.583923	2.25566	0.96864	1.23905	0.3152	0.02232	0.0665533	0.97771	0.38626	0.890946	0.97234	0.78404	0.9159	0.99265	0.48027	0.940348	0.76356	0.35728	0.705561
Backbone 1 GhostConv Replace + Head 11 C3k2_GhostConv Replace	2945434	0	3.41557	6.02316	11.2359	77.5882	12.8886	0.85264	0.877634	0.837421	0.74783	0.71948	0.70058	0.9	0.95	0.85	0.9	93	1	47	2055.78	23.5264	1037.78	1.18151	0.37061	0.532117	2.35807	0.4632	0.767674	2.3085	1.12066	1.34464	0.32264	0.04358	0.0808041	0.90674	0.24821	0.82414	0.96424	0.80308	0.909906	0.93286	0.40826	0.875808	0.76922	0.28261	0.70673
Backbone 1 GhostConv Replace + Head 2 C3k2_GhostConv Replace	2652058	0	3.28652	5.48193	10.1168	71.7049	13.946	0.809693	0.893644	0.847368	0.859649	0.831099	0.812067	0.9	0.95	0.85	0.9	200	1	100.5	4494.71	24.4614	2260.93	1.08852	0.20149	0.287738	2.27535	0.22696	0.351311	2.18887	0.90908	1.01602	0.3155	0.01521	0.0334701	0.99345	0.42343	0.955342	0.98604	0.78126	0.962933	0.99368	0.48955	0.98061	0.80496	0.37229	0.777619
Backbone 1 GhostConv Replace + Head 5 C3k2_GhostConv Replace	2661978	0	3.30351	5.48785	10.1546	72.2176	13.847	0.872162	0.899184	0.909167	0.779819	0.75025	0.730537	0.9	0.95	0.85	0.9	107	1	54	2406.68	24.184	1215.44	1.17877	0.24157	0.353844	2.15258	0.29454	0.623976	2.24712	0.96397	1.11561	0.32626	0.02372	0.0472857	0.95021	0.22056	0.778552	0.94802	0.80634	0.893652	0.96686	0.37021	0.869431	0.7784	0.26854	0.701693
Backbone 1 GhostConv Replace + Head 8 C3k2_GhostConv Replace	2639770	0	3.26686	5.44452	10.0699	71.5934	13.9678	0.865714	0.877465	0.90232	0.816154	0.779242	0.754634	0.9	0.95	0.85	0.9	82	1	41.5	1866.36	24.6298	945.779	1.14524	0.23188	0.369402	2.26212	0.25769	0.524685	2.23032	0.95047	1.13448	0.31045	0.01946	0.046429	0.98568	0.21236	0.898253	0.97563	0.26391	0.924318	0.98978	0.20504	0.947138	0.76503	0.14997	0.721882
Backbone 1 GhostConv Replace + Backbone 2 C3k2_GhostConv Replace	2665930	0	3.37192	5.5083	10.1697	79.7742	12.5354	0.889538	0.913952	0.829833	0.735097	0.686183	0.653574	0.9	0.95	0.85	0.9	163	1	82	3655.12	24.14	1840.99	1.09618	0.24316	0.366585	2.01006	0.29192	0.743914	2.29508	0.99437	1.16099	0.30109	0.01817	0.0408108	0.97376	0.24701	0.703592	0.97191	0.75546	0.903619	0.98394	0.26755	0.763942	0.68017	0.20661	0.518732
Backbone 1 GhostConv Replace + Backbone 4 C3k2_GhostConv Replace	2675834	0	3.35349	5.52527	10.2075	73.8189	13.5467	0.827979	0.851128	0.876169	0.756369	0.707269	0.674536	0.9	0.95	0.85	0.9	149	1	75	3333.53	24.3482	1679.69	1.14484	0.23763	0.3668	2.02949	0.27622	0.521864	2.17835	0.95373	1.1283	0.31253	0.02003	0.0506116	0.97433	0.45826	0.874896	0.97974	0.80422	0.920381	0.99057	0.49301	0.936799	0.67238	0.34247	0.641667
Backbone 1 GhostConv Replace + Backbone 6 C3k2_GhostConv Replace	2713434	0	3.38462	5.57669	10.3509	71.3119	14.0229	0.86619	0.898773	0.878781	0.686396	0.623798	0.582066	0.9	0.95	0.85	0.9	93	1	47	2107.77	24.3495	1065.88	1.16925	0.28068	0.452898	2.25005	0.3304	0.68872	2.20743	0.98549	1.17696	0.32813	0.0316	0.104747	0.96878	0.2434	0.830281	0.96673	0.79205	0.897452	0.98099	0.36547	0.897099	0.57941	0.29602	0.5549
Backbone 1 GhostConv Replace + Backbone 8 C3k2_GhostConv Replace	2863514	0	3.38281	5.86197	10.9234	69.5303	14.3822	0.836278	0.953746	0.939836	0.552369	0.490625	0.449462	0.9	0.95	0.85	0.9	80	1	40.5	1771.25	23.9955	898.54	1.16924	0.28776	0.460731	2.43333	0.33155	0.761986	2.21997	1.02875	1.26706	0.30363	0.02357	0.0628254	0.9594	0.24131	0.75851	0.96194	0.75978	0.876847	0.97932	0.35843	0.834179	0.50918	0.21258	0.441821
Backbone 2 C3k2_GhostConv Replace	2666577	0	3.40222	5.48692	10.1722	72.4899	13.795	0.82143	0.908142	0.821838	0.824903	0.789081	0.7652	0.9	0.95	0.85	0.9	95	1	48	2070.87	23.2326	1047.24	1.20323	0.24663	0.45691	2.27038	0.26231	0.587904	2.30767	0.94695	1.24203	0.31843	0.02401	0.0742699	0.99442	0.29921	0.90041	0.98668	0.52006	0.919917	0.99352	0.30439	0.934911	0.76912	0.20891	0.715218
Backbone 3 GhostConv Replace	2650728	0	3.26501	5.45343	10.1117	65.738	15.2119	0.839024	0.866981	0.903108	0.858456	0.829503	0.810201	0.9	0.95	0.85	0.9	138	1	69.5	2912.55	23.8608	1470.38	1.15599	0.21727	0.31845	2.32655	0.25997	0.56036	2.25686	0.93438	1.06591	0.31551	0.01886	0.040703	0.99497	0.34828	0.862602	0.99559	0.74985	0.944077	0.99391	0.34771	0.913545	0.81413	0.26826	0.74078
Backbone 3 GhostConv Replace + Head 11 C3k2_GhostConv Replace	2934522	0	3.36519	6.01224	11.1943	68.5325	14.5916	0.863356	0.958741	0.864108	0.817613	0.780712	0.756111	0.9	0.95	0.85	0.9	181	1	91	4018.52	23.8339	2015	1.31998	0.24954	0.393494	2.7432	0.27922	0.557289	2.39522	0.95898	1.13804	0.39062	0.02721	0.0822064	0.98189	0.31851	0.835015	0.97669	0.39025	0.899357	0.99036	0.35741	0.894007	0.74911	0.23025	0.668873
Backbone 3 GhostConv Replace + Head 2 C3k2_GhostConv Replace	2641146	0	3.23614	5.44293	10.0752	70.2742	14.23	0.822127	0.959631	0.928473	0.587664	0.513342	0.463794	0.9	0.95	0.85	0.9	67	1	34	1543.43	24.5155	784.812	1.20816	0.32338	0.565546	2.5034	0.48544	0.921289	2.28188	1.05445	1.40232	0.31298	0.03648	0.0938154	0.91608	0.35025	0.720729	0.96208	0.74094	0.834349	0.95711	0.48421	0.81499	0.56446	0.35092	0.506581
Backbone 3 GhostConv Replace + Head 5 C3k2_GhostConv Replace	2651066	0	3.25313	5.47436	10.113	71.1708	14.0507	0.935385	0.927046	0.929745	0.898237	0.877794	0.864165	0.9	0.95	0.85	0.9	157	1	79	3603.65	24.9678	1817.78	1.22986	0.20739	0.357422	2.43514	0.22868	0.508186	2.31129	0.92523	1.12336	0.32584	0.01777	0.0487719	0.99758	0.19528	0.897329	0.98517	0.69344	0.934513	0.99418	0.30855	0.937031	0.87219	0.23068	0.796345
Backbone 3 GhostConv Replace + Head 8 C3k2_GhostConv Replace	2628858	0	3.21648	5.42676	10.0283	69.8917	14.3079	0.901172	0.930831	0.919928	0.733868	0.694079	0.667553	0.9	0.95	0.85	0.9	119	1	60	2729.28	24.925	1381.84	1.22841	0.2348	0.447986	2.52208	0.25644	0.56212	2.25231	0.94952	1.20495	0.31992	0.02209	0.109499	0.86009	0.36005	0.704637	0.94384	0.64963	0.873969	0.96759	0.44977	0.883184	0.71664	0.29692	0.652696
Backbone 3 GhostConv Replace + Backbone 2 C3k2_GhostConv Replace	2655018	0	3.32154	5.48114	10.1281	81.5455	12.2631	0.895285	0.944878	0.853587	0.794865	0.761003	0.738428	0.9	0.95	0.85	0.9	123	1	62	2816.74	24.6582	1419.62	1.21155	0.23561	0.395752	2.0668	0.2642	0.502607	2.26812	0.94989	1.17081	0.32301	0.01911	0.0529402	0.9951	0.42987	0.938185	0.92623	0.76727	0.893017	0.95803	0.4897	0.922202	0.75128	0.37888	0.717006
Backbone 3 GhostConv Replace + Backbone 4 C3k2_GhostConv Replace	2664922	0	3.30311	5.49243	10.1659	72.4796	13.797	0.815064	0.883319	0.911029	0.1755	0.151305	0.135175	0.9	0.95	0.85	0.9	92	1	46.5	2118.96	24.6283	1072.43	1.14448	0.27904	0.439251	2.22561	0.31613	0.666199	2.16953	1.01103	1.21426	0.31037	0.02992	0.0728397	0.71991	0.23292	0.53429	0.96306	0.34028	0.76231	0.73937	0.23714	0.601796	0.49165	0.10506	0.37614
Backbone 3 GhostConv Replace + Backbone 6 C3k2_GhostConv Replace	2702522	0	3.33424	5.55942	10.3093	69.2455	14.4414	0.929639	0.887769	0.889552	0.840793	0.807926	0.786015	0.9	0.95	0.85	0.9	95	1	48	2156.54	24.3993	1091.36	1.23917	0.23919	0.442247	2.52357	0.24916	0.573152	2.3804	0.96629	1.25614	0.33474	0.02002	0.0717003	0.99743	0.07478	0.915686	0.99606	0.7682	0.945455	0.99466	0.08898	0.953607	0.82423	0.0386	0.769696
Backbone 3 GhostConv Replace + Backbone 8 C3k2_GhostConv Replace	2852602	0	3.33243	5.84445	10.8818	69.5537	14.3774	0.872067	0.946144	0.900716	0.660676	0.590068	0.542996	0.9	0.95	0.85	0.9	101	1	51	2294.02	23.834	1158.95	1.17274	0.22922	0.349675	2.49641	0.2777	0.675173	2.30992	0.95736	1.12213	0.32117	0.01707	0.0403639	0.98535	0.17307	0.791737	0.99595	0.72239	0.929408	0.99252	0.28496	0.860017	0.6235	0.18216	0.520476
Backbone 4 C3k2_GhostConv Replace	2676481	0	3.3838	5.50712	10.21	70.4911	14.1862	0.880569	0.930993	0.85803	0.593258	0.530609	0.488843	0.9	0.95	0.85	0.9	121	1	61	2689.83	24.0268	1361.71	1.14451	0.26095	0.441991	2.52264	0.28995	0.766266	2.18302	0.99183	1.20804	0.31846	0.0284	0.0984726	0.82379	0.2271	0.574524	0.98658	0.66178	0.827574	0.91122	0.29352	0.703805	0.51018	0.2121	0.400874
Backbone 5 GhostConv Replace	2614584	0	3.26276	5.38953	9.97385	66.9724	14.9315	0.92175	0.921798	0.880423	0.747775	0.697923	0.664687	0.9	0.95	0.85	0.9	142	1	71.5	3005.37	22.2281	1508.09	1.14981	0.28324	0.441047	2.46894	0.29636	0.57501	2.14401	1.00112	1.19765	0.32822	0.03144	0.0866109	0.95047	0.34854	0.812598	0.94635	0.14749	0.86166	0.98155	0.14966	0.886849	0.67183	0.09043	0.605576
Backbone 5 GhostConv Replace + Head 11 C3k2_GhostConv Replace	2898378	0	3.36295	5.95212	11.0564	69.5797	14.372	0.924887	0.96923	0.898602	0.848924	0.825812	0.810404	0.9	0.95	0.85	0.9	200	1	100.5	4455.25	23.953	2232.34	1.18681	0.24392	0.351076	2.39028	0.30728	0.526085	2.18297	0.96252	1.10836	0.32898	0.02633	0.0489096	0.97367	0.28569	0.899467	0.9632	0.73536	0.923411	0.95957	0.29493	0.920874	0.8073	0.20152	0.767904
Backbone 5 GhostConv Replace + Head 2 C3k2_GhostConv Replace	2605002	0	3.23389	5.37414	9.93729	70.0795	14.2695	0.931465	0.874738	0.844689	0.699222	0.638031	0.597237	0.9	0.95	0.85	0.9	67	1	34	1514.17	24.6468	769.837	1.17915	0.29601	0.459022	2.44917	0.32595	0.65218	2.21507	1.01458	1.23595	0.31168	0.03496	0.0802193	0.98154	0.39406	0.876596	0.96958	0.82089	0.921418	0.9849	0.45876	0.92911	0.66236	0.32791	0.58877
Backbone 5 GhostConv Replace + Head 5 C3k2_GhostConv Replace	2614922	0	3.25088	5.41156	9.97514	69.3853	14.4123	0.859805	0.93063	0.905755	0.711133	0.650996	0.610905	0.9	0.95	0.85	0.9	200	1	100.5	4566.82	24.6141	2287.55	1.12428	0.20195	0.302411	2.34272	0.22606	0.414275	2.13909	0.90422	1.02557	0.31561	0.01776	0.0444483	0.96626	0.20072	0.847577	0.97566	0.66323	0.906576	0.99279	0.24376	0.934139	0.59658	0.17203	0.550229
Backbone 5 GhostConv Replace + Head 8 C3k2_GhostConv Replace	2592714	0	3.21423	5.36926	9.89042	69.4627	14.3962	0.818765	0.929109	0.930374	0.865473	0.838126	0.819895	0.9	0.95	0.85	0.9	200	1	100.5	4493.56	24.4303	2261.3	1.22368	0.23019	0.36004	2.25328	0.26166	0.480392	2.36445	0.95983	1.12958	0.31776	0.02031	0.0565066	0.99849	0.22587	0.9306	0.9848	0.84252	0.959668	0.99408	0.32409	0.962381	0.81345	0.22243	0.773471
Backbone 5 GhostConv Replace + Backbone 2 C3k2_GhostConv Replace	2618874	0	3.31929	5.41174	9.99021	77.7825	12.8564	0.826299	0.972875	0.858765	0.731337	0.680068	0.64589	0.9	0.95	0.85	0.9	145	1	73	3330.07	24.7594	1678.84	1.23639	0.24174	0.420919	2.46103	0.2926	0.569658	2.36619	0.96137	1.21966	0.32806	0.01961	0.0567488	0.96215	0.37353	0.831145	0.95744	0.72473	0.879144	0.97573	0.4203	0.903546	0.66074	0.26354	0.598472
Backbone 5 GhostConv Replace + Backbone 4 C3k2_GhostConv Replace	2628778	0	3.30086	5.42987	10.028	71.9018	13.9079	0.857003	0.859674	0.82112	0.798085	0.756528	0.728823	0.9	0.95	0.85	0.9	136	1	68.5	3132.93	24.5402	1579.69	1.18077	0.19667	0.32293	2.24857	0.21529	0.407157	2.19935	0.90657	1.06801	0.31636	0.0175	0.0464254	0.99969	0.28337	0.946231	0.996	0.69646	0.954129	0.99458	0.42513	0.96889	0.77414	0.32345	0.726166
Backbone 5 GhostConv Replace + Backbone 6 C3k2_GhostConv Replace	2666378	0	3.33199	5.49033	10.1714	67.3037	14.858	0.848589	0.892785	0.84392	0.796952	0.755906	0.728542	0.9	0.95	0.85	0.9	113	1	57	2563.21	24.9128	1294.63	1.2144	0.24828	0.429043	2.45611	0.27385	0.565336	2.21065	0.96588	1.18809	0.31762	0.0254	0.0993258	0.99091	0.29688	0.883137	0.97155	0.73372	0.91553	0.99126	0.35905	0.926548	0.72622	0.26342	0.687495
Backbone 5 GhostConv Replace + Backbone 8 C3k2_GhostConv Replace	2816458	0	3.33018	5.78806	10.7439	67.4348	14.8291	0.87946	0.9621	0.887479	0.763693	0.714881	0.682341	0.9	0.95	0.85	0.9	156	1	78.5	3465.55	23.9377	1747.68	1.19902	0.23504	0.367123	2.63807	0.2665	0.655719	2.2154	0.94373	1.10933	0.31772	0.02377	0.0575695	0.98513	0.19225	0.723924	0.99359	0.7167	0.907637	0.99161	0.30504	0.826561	0.68031	0.19494	0.578531
Backbone 6 C3k2_GhostConv Replace	2714081	0	3.41493	5.57399	10.3534	66.7867	14.973	0.847776	0.889181	0.892254	0.709292	0.653936	0.617032	0.9	0.95	0.85	0.9	118	1	59.5	2609.05	23.6324	1317.19	1.23659	0.33383	0.520643	2.58855	0.40848	0.860499	2.34771	1.09471	1.37154	0.30953	0.03911	0.0940102	0.94777	0.00987	0.700207	0.98766	0.12545	0.872009	0.97153	0.01085	0.811004	0.65528	0.0077	0.542207
Backbone 7 GhostConv Replace	2583256	0	3.30752	5.32092	9.85434	66.4246	15.0547	0.827541	0.926047	0.909039	0.790843	0.764907	0.747615	0.9	0.95	0.85	0.9	104	1	52.5	2271.25	23.236	1148.51	1.23849	0.32347	0.523615	2.38081	0.36115	0.652831	2.37811	1.06218	1.36296	0.31805	0.03103	0.0747847	0.96325	0.39458	0.84556	0.91968	0.62388	0.818781	0.968	0.43215	0.87488	0.78579	0.31401	0.708512
Backbone 7 GhostConv Replace + Head 11 C3k2_GhostConv Replace	2867050	0	3.40771	5.87558	10.9369	68.8902	14.5159	0.841471	0.927663	0.855499	0.740178	0.692004	0.659888	0.9	0.95	0.85	0.9	117	1	59	2610.25	24.1717	1314.89	1.15752	0.24554	0.375196	2.22027	0.28339	0.592738	2.16892	0.96471	1.13492	0.32508	0.02422	0.0567674	0.96492	0.23739	0.835595	0.961	0.79628	0.899545	0.97435	0.32907	0.88445	0.67617	0.23824	0.613299
Backbone 7 GhostConv Replace + Head 2 C3k2_GhostConv Replace	2573674	0	3.27866	5.32446	9.81779	71.2152	14.0419	0.927434	0.96101	0.890029	0.89384	0.872975	0.859065	0.9	0.95	0.85	0.9	134	1	67.5	3082.52	25.0389	1555.33	1.20724	0.23232	0.37843	2.72659	0.2615	0.497393	2.28636	0.93819	1.10436	0.32754	0.02766	0.0846563	1	0.24822	0.929149	0.98692	0.7003	0.94374	0.99121	0.27188	0.948627	0.86427	0.20357	0.820178
Backbone 7 GhostConv Replace + Head 5 C3k2_GhostConv Replace	2583594	0	3.29565	5.33612	9.85563	70.507	14.183	0.865394	0.964194	0.832852	0.843061	0.811566	0.790569	0.9	0.95	0.85	0.9	82	1	41.5	1885.86	24.7835	957.442	1.16051	0.31858	0.557736	1.98248	0.36934	0.611964	2.2097	1.06	1.3802	0.31563	0.04284	0.124672	0.99152	0.49575	0.947563	0.9822	0.72606	0.933256	0.99266	0.59652	0.970991	0.79511	0.42317	0.754493
Backbone 7 GhostConv Replace + Head 8 C3k2_GhostConv Replace	2561386	0	3.259	5.29266	9.77091	69.8166	14.3232	0.946298	0.909345	0.864009	0.768785	0.725322	0.696348	0.9	0.95	0.85	0.9	74	1	37.5	1672.52	24.4418	850.177	1.18141	0.30475	0.478642	2.30226	0.37253	0.716541	2.26782	1.0395	1.25693	0.30753	0.03262	0.0987981	0.95763	0.25798	0.808342	0.95422	0.74092	0.889795	0.97161	0.34736	0.89144	0.72339	0.25952	0.666304
Backbone 7 GhostConv Replace + Backbone 2 C3k2_GhostConv Replace	2587546	0	3.36405	5.34418	9.8707	77.0132	12.9848	0.890971	0.870009	0.909764	0.748352	0.696806	0.662442	0.9	0.95	0.85	0.9	84	1	42.5	1890.05	24.2722	957.771	1.23169	0.24907	0.431384	2.53416	0.28079	0.642393	2.30908	0.98332	1.23322	0.31616	0.0246	0.0665382	0.99018	0.20445	0.837312	0.97295	0.82822	0.93333	0.9913	0.31734	0.895134	0.67557	0.20494	0.592392
Backbone 7 GhostConv Replace + Backbone 4 C3k2_GhostConv Replace	2597450	0	3.34563	5.3645	9.90849	72.3331	13.8249	0.828102	0.921436	0.905892	0.705965	0.646168	0.606302	0.9	0.95	0.85	0.9	91	1	46	2060.54	24.787	1043.3	1.20696	0.27292	0.469632	2.47118	0.32527	0.775627	2.2684	0.99992	1.25048	0.31425	0.02768	0.0970824	0.96504	0.24004	0.747882	0.99399	0.80862	0.920305	0.98533	0.30165	0.85562	0.66054	0.22214	0.578168
Backbone 7 GhostConv Replace + Backbone 6 C3k2_GhostConv Replace	2635050	0	3.37676	5.43869	10.0519	68.0281	14.6998	0.82111	0.892553	0.876748	0.851154	0.821787	0.802209	0.9	0.95	0.85	0.9	166	1	83.5	3705.79	24.1571	1867.28	1.14451	0.20866	0.345747	2.36755	0.22368	0.447231	2.20922	0.92388	1.0769	0.30592	0.01779	0.0685723	0.9933	0.2784	0.914504	0.95853	0.68605	0.910908	0.98844	0.36413	0.945662	0.79559	0.26071	0.757656
Backbone 7 GhostConv Replace + Backbone 8 C3k2_GhostConv Replace	2785130	0	3.37494	5.71933	10.6244	68.7188	14.5521	0.911194	0.882169	0.860631	0.70435	0.65395	0.62035	0.9	0.95	0.85	0.9	120	1	60.5	2720.34	24.4179	1373.6	1.01347	0.27793	0.445119	2.02138	0.26837	0.646624	2.05249	0.99986	1.21197	0.2993	0.03226	0.0951797	0.85769	0.24269	0.641495	0.94885	0.71263	0.876776	0.96212	0.30862	0.791823	0.68202	0.24044	0.562229
Backbone 8 C3k2_GhostConv Replace	2864161	0	3.41312	5.85298	10.9259	68.1654	14.6702	0.809303	0.924958	0.932479	0.572131	0.496416	0.445939	0.9	0.95	0.85	0.9	85	1	43	1882.86	24.0422	953.37	1.15477	0.29502	0.483929	2.28266	0.32872	0.629422	2.3016	1.02655	1.34958	0.31144	0.02928	0.0967259	0.86729	0.20435	0.745231	0.96316	0.62825	0.858077	0.95816	0.28936	0.857753	0.51324	0.17986	0.463602
