# Supplementary material
Source: Research Square preprint supplement (doi:10.21203/rs.3.rs-10112780/v1)
Supplement: Supplementary file 2 [file ceac1db5dd5a2b159c7cfea8.xlsx]

## Sheet: Sheet1
Experiment Name	total_params	trainable_params	flops_gflops	model_size_mb	memory_usage_mb	avg_inference_time_ms	fps	noise_robustness	augmentation_robustness	lighting_robustness	iou_75_performance	iou_85_performance	iou_90_performance	tensorrt_compatibility	onnx_compatibility	quantization_compatibility	pruning_compatibility	epoch_Max	epoch_Min	epoch_Mean	time_Max	time_Min	time_Mean	train/box_loss_Max	train/box_loss_Min	train/box_loss_Mean	train/cls_loss_Max	train/cls_loss_Min	train/cls_loss_Mean	train/dfl_loss_Max	train/dfl_loss_Min	train/dfl_loss_Mean	train/angle_loss_Max	train/angle_loss_Min	train/angle_loss_Mean	metrics/precision(B)_Max	metrics/precision(B)_Min	metrics/precision(B)_Mean	metrics/recall(B)_Max	metrics/recall(B)_Min	metrics/recall(B)_Mean	metrics/mAP50(B)_Max	metrics/mAP50(B)_Min	metrics/mAP50(B)_Mean	metrics/mAP50-95(B)_Max	metrics/mAP50-95(B)_Min	metrics/mAP50-95(B)_Mean
AEE	2946065	0	3.44588	5.97919	11.2383	67.5668	14.8002	0.898815	0.897441	0.856061	0.770905	0.723047	0.691142	0.9	0.95	0.85	0.9	80	1	40.5	1668.42	22.6937	844.049	1.21844	0.31641	0.53131	2.24599	0.34494	0.646171	2.37502	1.06649	1.36182	0.31292	0.0368	0.113365	0.9953	0.39785	0.914974	0.99648	0.76943	0.958981	0.99477	0.55934	0.959901	0.71087	0.34082	0.653293
baseline	2662287	0	3.3457	5.43853	10.1558	65.8363	15.1892	0.933634	0.927081	0.892799	0.767446	0.721138	0.690266	0.9	0.95	0.85	0.9	141	1	71	3003.99	21.9042	1475.55	1.24021	0.21551	0.373542	2.79261	0.25864	0.52521	2.32807	0.92243	1.11217	0.31648	0.01976	0.0702804	0.98926	0.43098	0.899631	0.96397	0.5186	0.923613	0.98679	0.24345	0.93535	0.68894	0.14444	0.616791
PECA	2946081	0	3.44588	5.91356	11.2384	68.346	14.6314	0.806142	0.889787	0.862766	0.969913	0.965472	0.962511	0.9	0.95	0.85	0.9	200	1	100.5	4176.59	22.481	2112.6	1.18862	0.26645	0.390328	2.33604	0.3044	0.506565	2.25656	0.9877	1.15497	0.31886	0.02391	0.054322	0.97767	0.24023	0.914246	0.97684	0.63738	0.919612	0.99194	0.28343	0.954087	0.9615	0.21101	0.898796
